# Supplementary material
Source: publisher figshare collection journal article supplement (https://acs.figshare.com/ndownloader/files/25734872)
Supplement: Supplementary file 1 [file 25734872]

# Supporting Information

## Fully Inkjet-printed Mesoporous SnO<sub>2</sub> Based Ultra-sensitive Gas Sensors for Trace Amount NO<sub>2</sub> Detection

Nehru Devabharathi,<sup>a</sup> Arun M. Umarji,<sup>b</sup> Subho Dasgupta,<sup>a,\*</sup>

<sup>a</sup>Department of Materials Engineering, Indian Institute of Science (IISc), C V Raman Avenue, Bangalore: 560012, Karnataka, India

<sup>b</sup>Materials Research Centre, Indian Institute of Science (IISc), C V Raman Avenue, Bangalore: 560012, Karnataka, India

\*Email: [dasgupta@iisc.ac.in](mailto:dasgupta@iisc.ac.in)

### Contents

- A. Schematic diagram representing a home-built gas sensing set up
- B. Characterization of the inkjet printable mesoporous SnO<sub>2</sub> precursor ink.
- C. Cross-section SEM micrographs of printed mesoporous SnO<sub>2</sub> films demonstrating correlation between the film thickness and the number of printing passes.
- D. Scanning electron micrograph of the flat and solid SnO<sub>2</sub> thin film printed without the polymer templating agent.
- E. Comparison of response at 5 ppm NO<sub>2</sub> concentration for printed 1-layer SnO<sub>2</sub> sensor as a function of measurement temperature.
- F. Sensor performance of printed flat and solid SnO<sub>2</sub> thin film based gas sensor with respect to NO<sub>2</sub> gas concentration.
- G. Comparison of NO<sub>2</sub> sensing ability of the printed (1-layer) mesoporous SnO<sub>2</sub> film with dry air and humid (RH 40%) and as the carrier gas.
- H. Printed 2-layer SnO<sub>2</sub> sensor characteristics with respect to temperature and NO<sub>2</sub> gas concentration

- I. Printed 3-layer SnO<sub>2</sub> sensor characteristics with respect to temperature and NO<sub>2</sub> gas concentration.
- J. Exemplary reproducibility test of 1-layer co-continuous mesoporous SnO<sub>2</sub> based NO<sub>2</sub> sensor and 175 °C along with average response versus NO<sub>2</sub> gas concentration data.
- K. Mesoporous SnO<sub>2</sub> (1-layer, printed) based sensor performance at 200 ppb NO<sub>2</sub> concentration measured at different temperatures.
- L. Comparison of 2- and 3-layer printed mesoporous SnO<sub>2</sub> based gas sensor performance with respect to temperature and analyte gas concentration.
- M. Printed (1- layer) mesoporous SnO<sub>2</sub> based gas sensor performance for oxidizing chlorine gas with dry air as the carrier gas.

### A. Schematic diagram of the home-built gas sensing set up

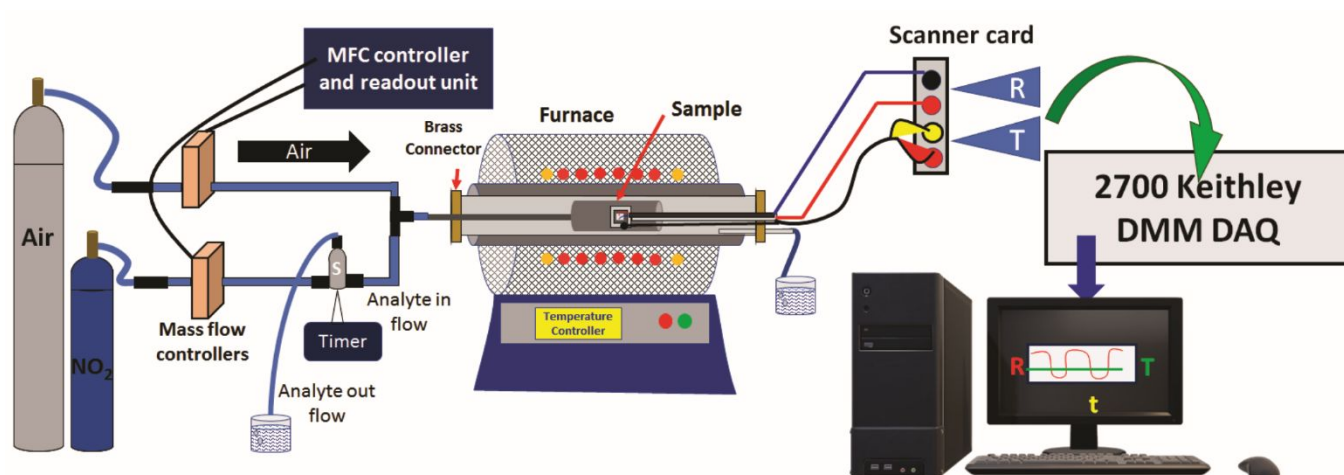

Figure S1. A schematic diagram of the assembled gas sensing set up used in the present study.<sup>S1</sup>

## B. Characterization of the inkjet printable mesoporous SnO<sub>2</sub> precursor ink

The as-prepared co-continuous mesoporous SnO<sub>2</sub> ink has been characterized for its suitability in inkjet printing. A dimensionless parameter, Ohnesorge number (Oh) can be defined as:

$$Oh = \frac{\eta}{\sqrt{\rho\sigma l}}$$

where  $\eta$ ,  $\rho$ ,  $\sigma$  and  $l$  are the dynamic viscosity, fluid density, surface tension and the characteristic length scale (droplet diameter) respectively.

Here, the measured parameters turn out be 4.46 mPa.s (Figure S2), 875 kgm<sup>-3</sup>, 21 mNm<sup>-1</sup> (Video S1), and 15  $\mu$ m, respectively.

This results in the value of the Ohnesorge number to be 0.2686. An inverse of Ohnesorge number  $Z$  (Oh<sup>-1</sup>) is considered as the measure of suitability of an ink for inkjet printing and should be within a range of 1- 10 to ensure ease of printing.

In the present case, the inverse Ohnesorge number

$Z = Oh^{-1} = \frac{\sqrt{\rho\sigma l}}{\eta}$  can be calculated as 3.72, which fits well within the preferred window prescribed for inkjet printing.

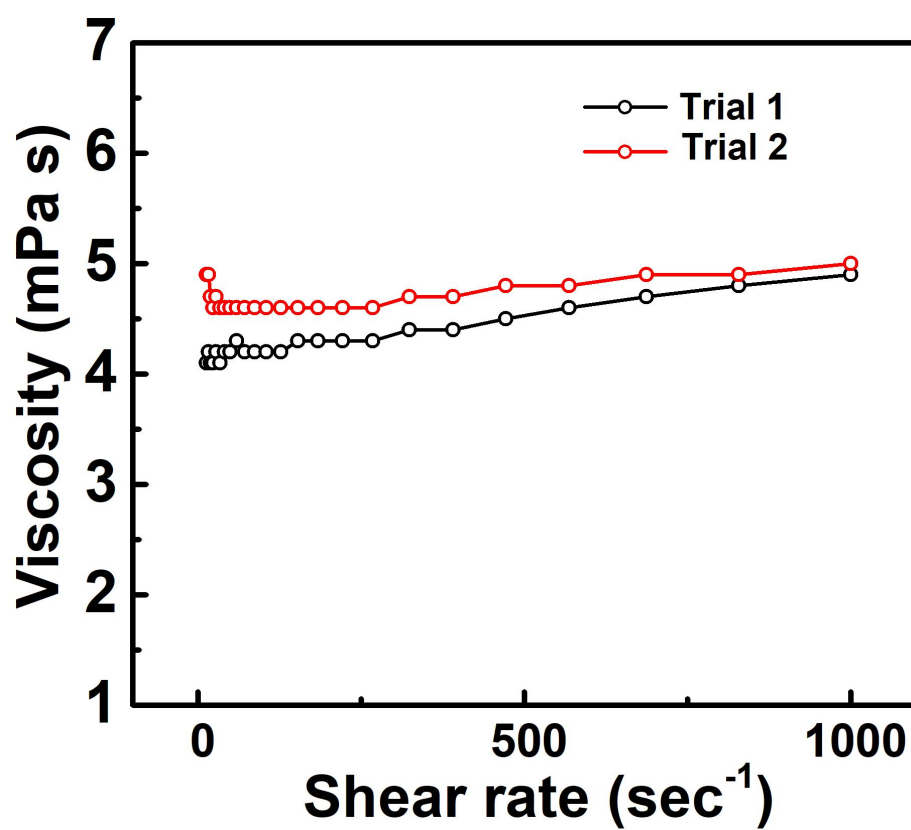

Figure S2: Viscosity measurement of the mesoporous SnO<sub>2</sub> ink.

### C. Cross-section SEM micrographs of printed mesoporous SnO<sub>2</sub> films

demonstrating correlation between the film thickness and the number of printing passes

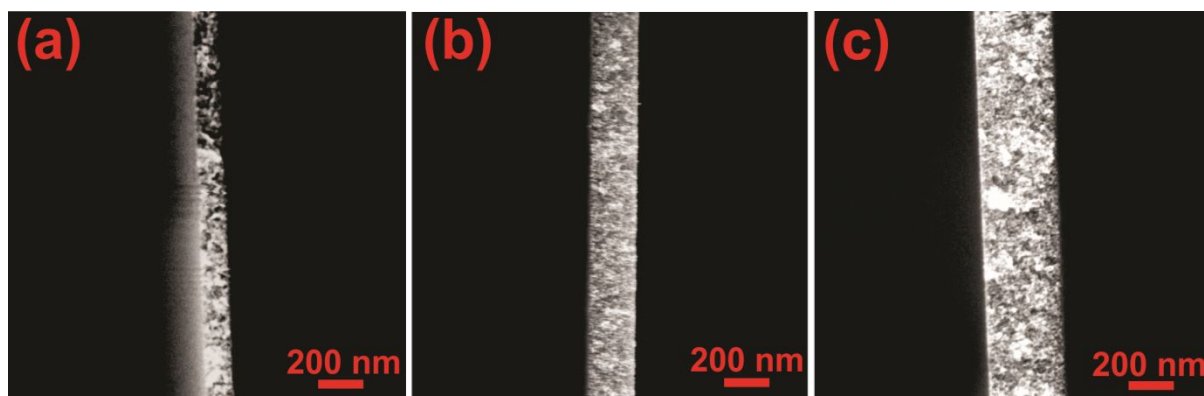

Figure S3: (a-c) Cross-section SEM micrographs of printed and annealed 1-, 2- and 3-layer mesoporous SnO<sub>2</sub> films, respectively. An increasing printing passes has found to increase the film thickness, with the thickness value ranging from 101 nm, 204 nm and 322 nm for 1-, 2- and 3-layer mesoporous SnO<sub>2</sub> films, respectively.

**D. Scanning electron micrograph of the flat and solid SnO<sub>2</sub> thin film printed without the polymer templating agent.**

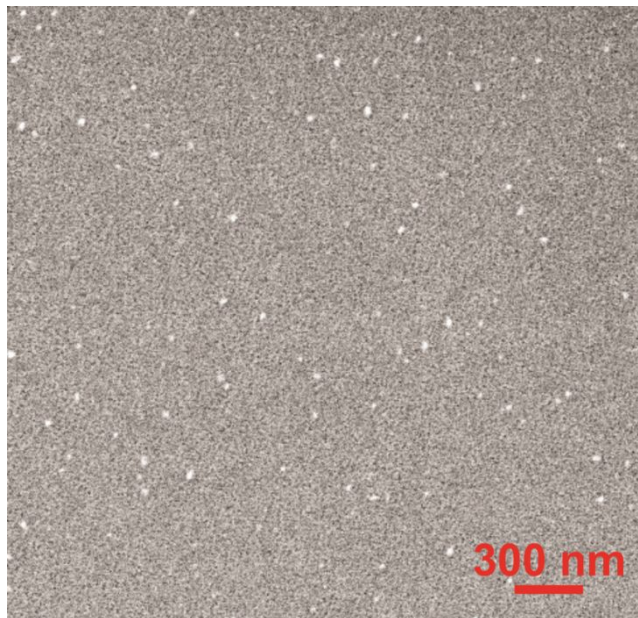

Figure S4. Scanning electron micrograph of non-porous, flat and solid SnO<sub>2</sub> thin film.

**E. Comparison of response at 5 ppm NO<sub>2</sub> concentration for the printed 1-layer SnO<sub>2</sub> sensor as a function of measurement temperature**

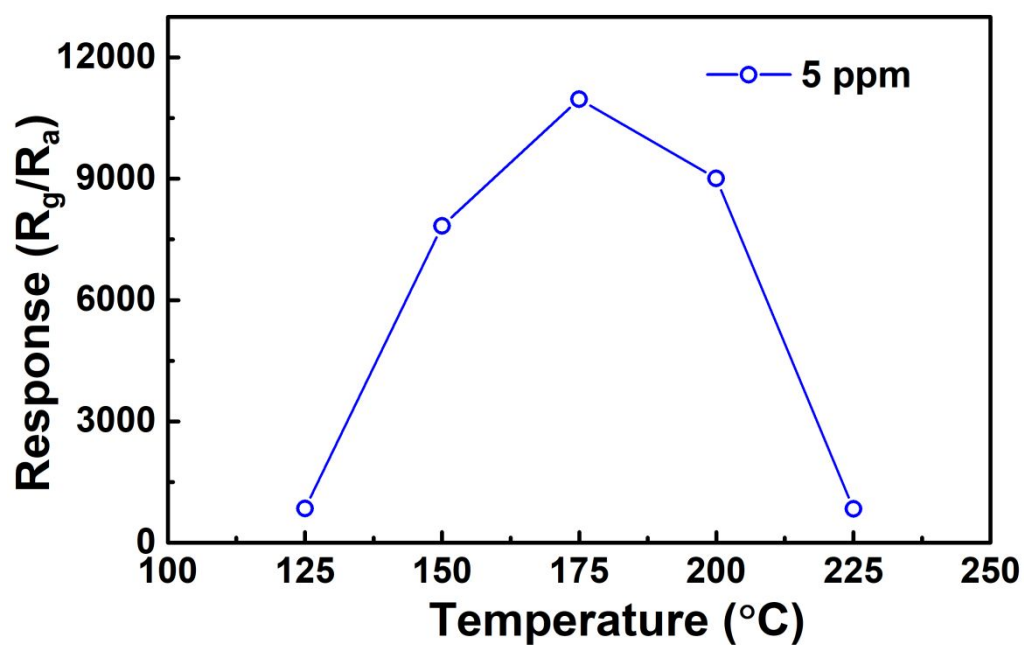

Figure S5. Sensor response at 5 ppm NO<sub>2</sub> concentration for 1-layer printed mesoporous SnO<sub>2</sub> sensor, measured at different temperatures.



**F. Sensor performance of printed flat and solid SnO<sub>2</sub> thin film based gas sensor with respect to NO<sub>2</sub> gas concentration**

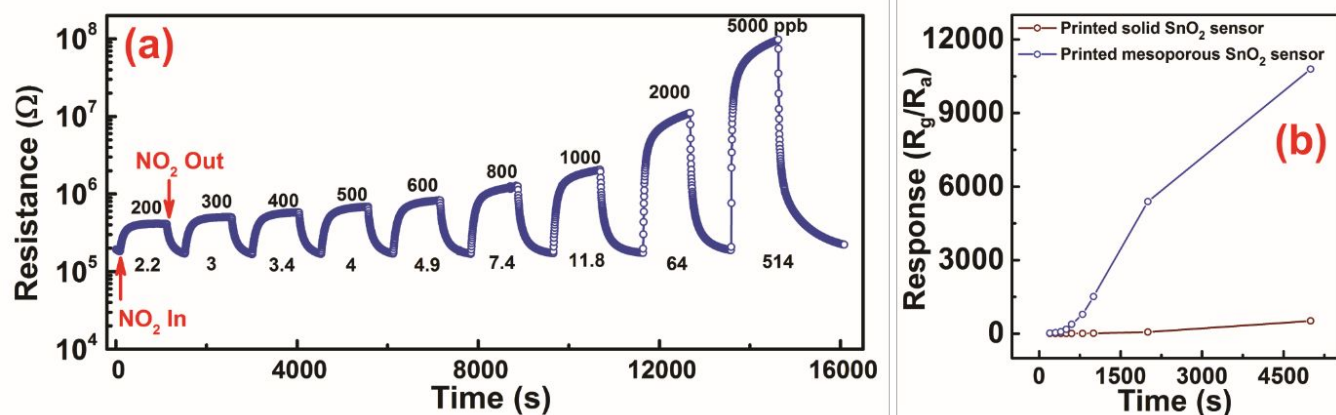

Figure S6: (a) Printed solid and flat SnO<sub>2</sub> thin film based sensor performance as a function of NO<sub>2</sub> concentration. (b) Comparison plot of mesoporous and non-porous (solid) tin oxide sensor performance at different concentration of NO<sub>2</sub>.

### G. Printed 2-layer SnO<sub>2</sub> sensor characteristics with respect to temperature and NO<sub>2</sub>

gas concentration

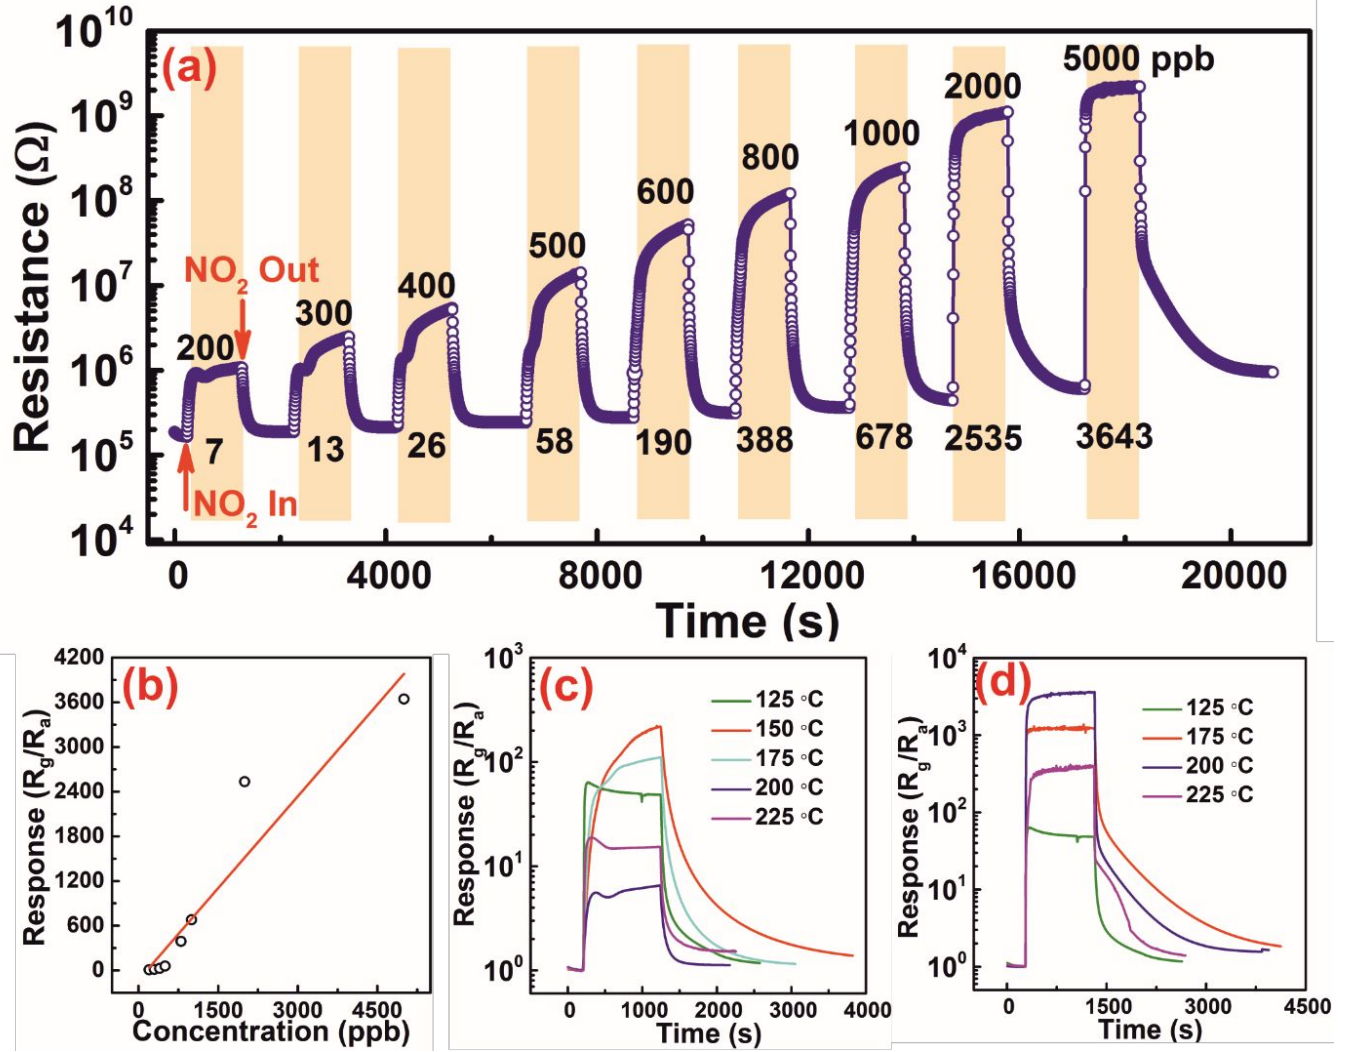

Figure S7. (a) Response curves of the 2-layer printed and annealed mesoporous SnO<sub>2</sub> based sensor measured with respect to varying analyte gas concentration. (b) Response-concentration relationship curve for the 2-layer printed sample showing a linear correlation. (c-d) Comparison of response curves for NO<sub>2</sub> concentration between 200 ppb to 5000 ppb measured at different temperatures.

## H. Printed 3-layer SnO<sub>2</sub> sensor characteristics with respect to temperature and NO<sub>2</sub>

gas concentration

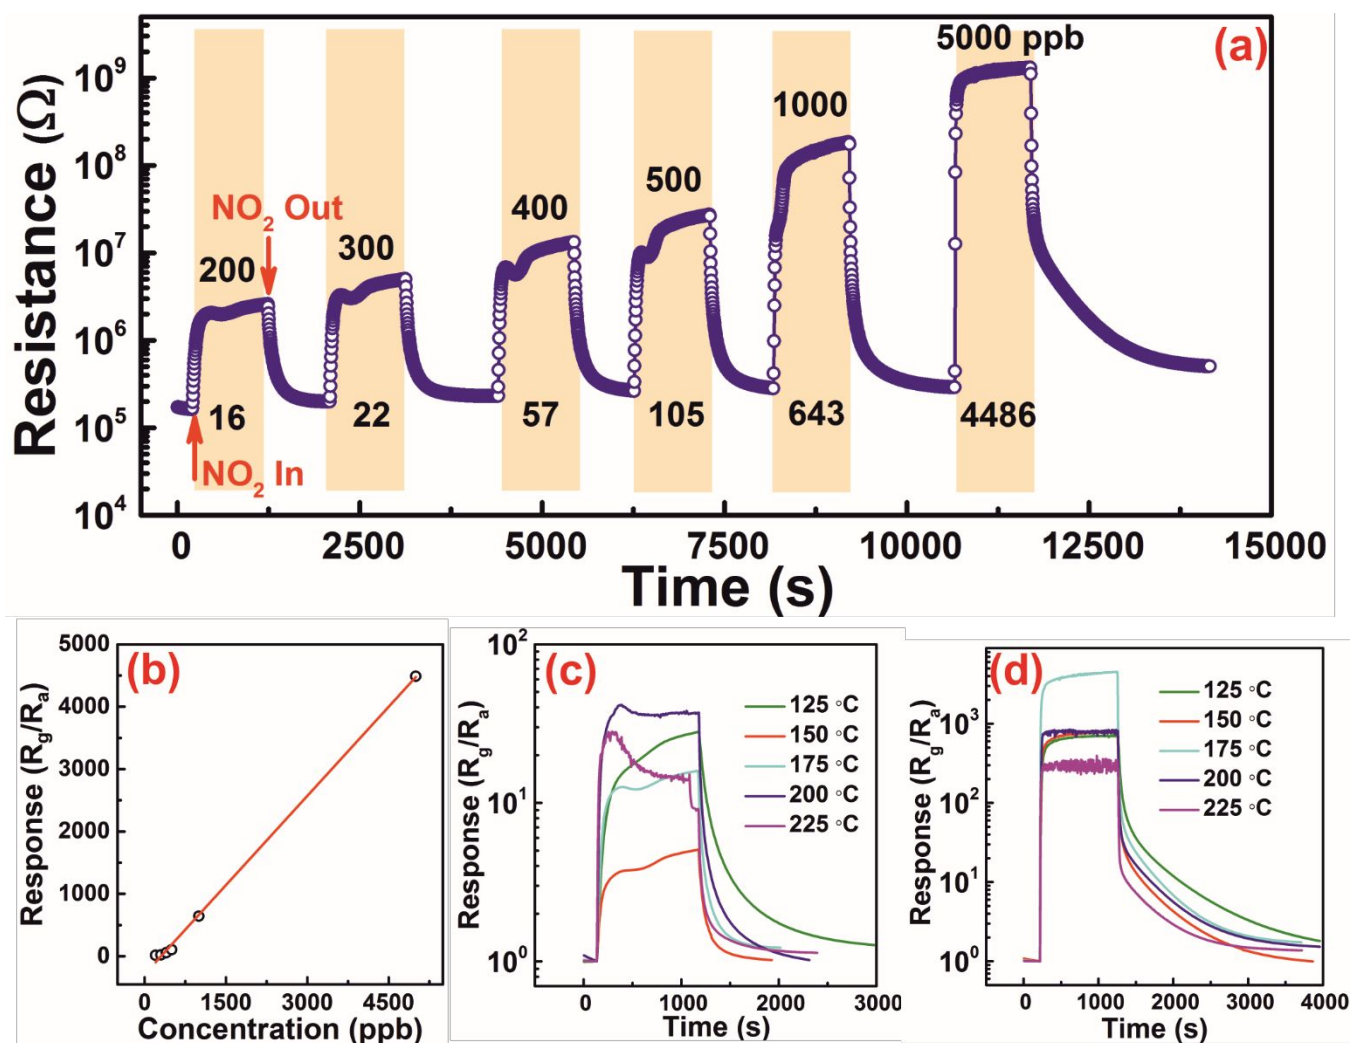

Figure S8. (a) Response curves of the 3-layer printed and annealed mesoporous SnO<sub>2</sub> based sensor measured with respect to varying analyte gas concentration. (b) Response-concentration relationship curve for the 3-layer printed sample showing a linear correlation. (c-d) Comparison of response curves for NO<sub>2</sub> concentration between 200 ppb to 5000 ppb measured at different temperatures.

**I. Comparison of 2- and 3-layer printed mesoporous SnO<sub>2</sub> based gas sensor performance with respect to temperature and analyte gas concentration.**

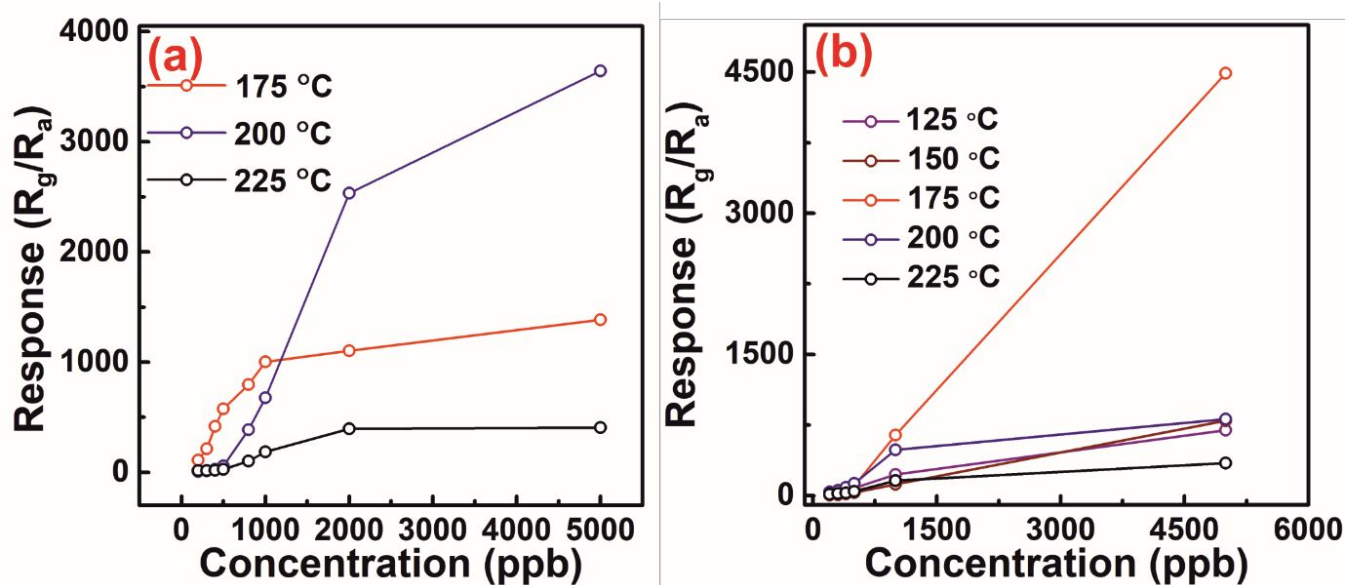

Figure S9. (a-b) 2-and 3-layer printed SnO<sub>2</sub> sensor performance comparison plot showing responses as a function of temperature and concentration, varied between 200 ppb to 5000 ppb.

**J. Exemplary reproducibility test of 1-layer co-continuous mesoporous SnO<sub>2</sub> based NO<sub>2</sub> sensor and 175 °C along with average response versus NO<sub>2</sub> gas concentration data**

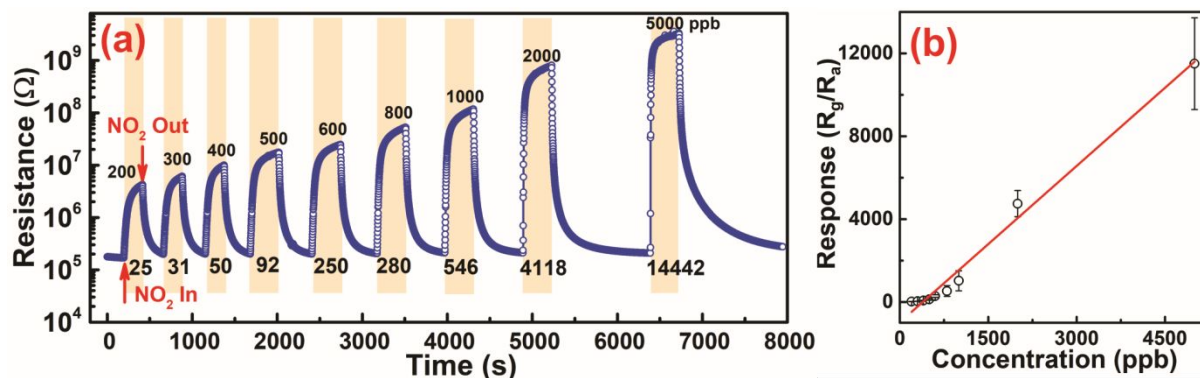

Figure S10: (a) An exemplary reproducibility test measurement with 1-layer co-continuous mesoporous SnO<sub>2</sub> based NO<sub>2</sub> sensor, carried out at 175 °C. (b) An average response (with standard deviation) versus NO<sub>2</sub> concentration plot, computed from three individual measurement data sets obtained from different mesoporous SnO<sub>2</sub> sensors, all measured at 175 °C.

**K. Mesoporous SnO<sub>2</sub> (1-layer, printed) based sensor performance at 200 ppb NO<sub>2</sub> concentration measured at different temperatures**

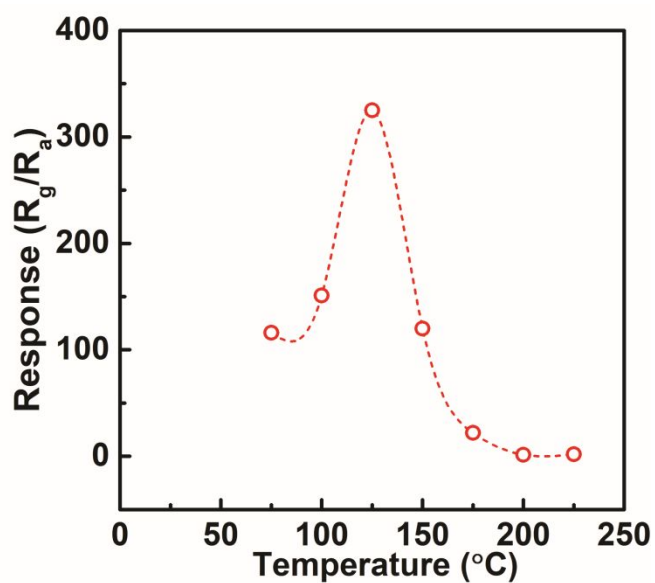

Figure S11 Mesoporous SnO<sub>2</sub> (1-layer, printed) based sensor response at 200 ppb NO<sub>2</sub> concentration compared for different measurement temperatures from 75 °C to 225 °C.

**N. Comparison of NO<sub>2</sub> sensing ability of the printed (1-layer) mesoporous SnO<sub>2</sub> film with dry air and humid (RH 40 %) and as the carrier gas**

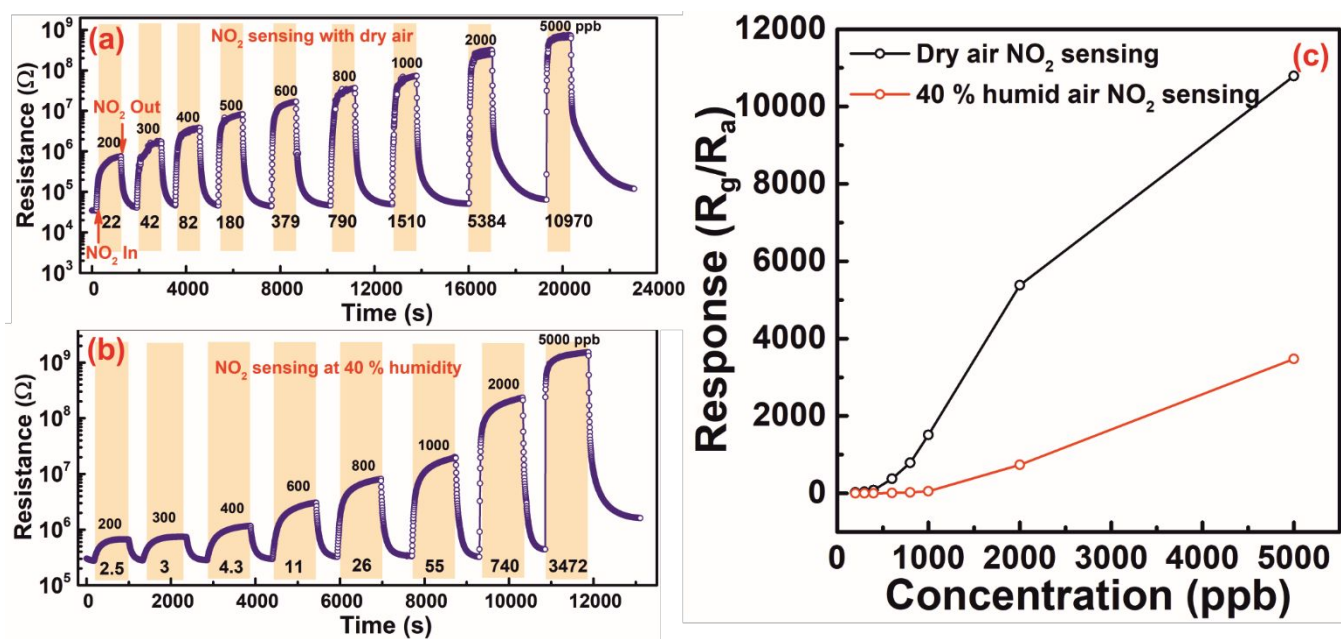

Figure S12: (a-b) NO<sub>2</sub> gas sensing performance measured at 175 °C with respect to dry air and humid air (40% relative humidity at room temperature) as the carrier gas. (c) Comparison of the NO<sub>2</sub> gas sensor performance with dry air and humid air (40 % relative humidity at room temperature) as the carrier gas.



**M. Printed (1- layer) mesoporous SnO<sub>2</sub> based gas sensor performance for oxidizing chlorine gas with dry air as the carrier gas**

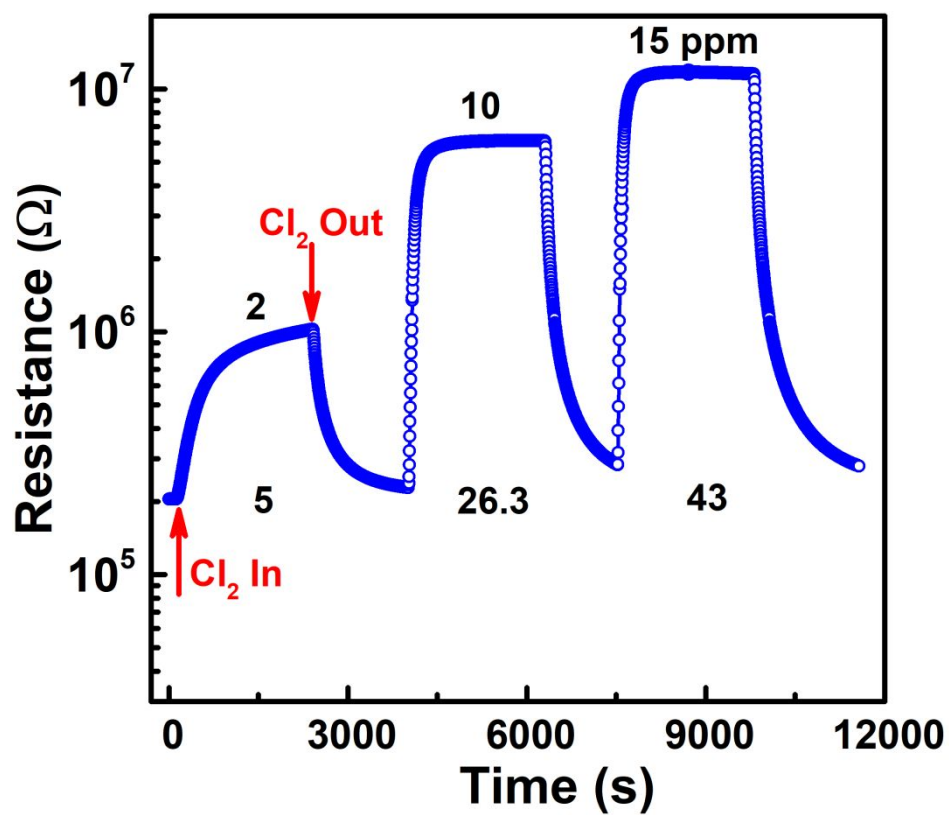

Figure S13: The chlorine gas sensing of the 1-layer printed mesoporous SnO<sub>2</sub> gas sensor measured at 175 °C, showing response against different chlorine gas concentrations



References:

- (S1) Tadeo, I. J.; Parasuraman, R.; Krupanidhi, S. B.; Umarji, A. M. Enhanced Humidity Responsive Ultrasonically Nebulised  $V_2O_5$  Thin Films . *Nano Express* **2020**, *1* (1), 010005.
